# Supplementary material
Source: PubMed Central journal article supplement (PMC8142859)
Supplement: mmc1.pdf [file mmc1.pdf]

## Supplemental information

### **An infectivity-enhancing site on the SARS-CoV-2 spike protein targeted by antibodies**

**Yafei Liu, Wai Tuck Soh, Jun-ichi Kishikawa, Mika Hirose, Emi E. Nakayama, Songling Li, Miwa Sasai, Tatsuya Suzuki, Asa Tada, Akemi Arakawa, Sumiko Matsuoka, Kanako Akamatsu, Makoto Matsuda, Chikako Ono, Shiho Torii, Kazuki Kishida, Hui Jin, Wataru Nakai, Noriko Arase, Atsushi Nakagawa, Maki Matsumoto, Yukoh Nakazaki, Yasuhiro Shindo, Masako Kohyama, Keisuke Tomii, Koichiro Ohmura, Shiro Ohshima, Toru Okamoto, Masahiro Yamamoto, Hironori Nakagami, Yoshiharu Matsuura, Atsushi Nakagawa, Takayuki Kato, Masato Okada, Daron M. Standley, Tatsuo Shioda, and Hisashi Arase**

**Table S1. Cryo-EM data collection and processing statistics, related to Figure 5.**

| <b>Sample</b>                           | Spike protein                          |            |            | Spike protein with 8D2 Fab             |            |            | Spike protein with COV2-2490 Fab       |            |  |
|-----------------------------------------|----------------------------------------|------------|------------|----------------------------------------|------------|------------|----------------------------------------|------------|--|
| <b>Data collection</b>                  |                                        |            |            |                                        |            |            |                                        |            |  |
| Microscope                              | Titan Krios                            |            |            | Titan Krios                            |            |            | Titan Krios                            |            |  |
| Acc. Voltage (kV)                       | 300                                    |            |            | 300                                    |            |            | 300                                    |            |  |
| Total electron dose (e <sup>-</sup> /Å) | 50                                     |            |            | 50                                     |            |            | 50                                     |            |  |
| Pixel size (Å)                          | 0.88                                   |            |            | 0.88                                   |            |            | 0.88                                   |            |  |
| Defocus range (µm)                      | -0.8 – -2.0 (0.15)                     |            |            | -0.8 – -2.0 (0.15)                     |            |            | -0.8 – -2.0 (0.15)                     |            |  |
| Magnification                           | 81,000                                 |            |            | 81,000                                 |            |            | 81,000                                 |            |  |
| Corrected Cs (mm)                       | 0.0452                                 |            |            | 0.059                                  |            |            | 0.0355                                 |            |  |
| <b>Data processing</b>                  |                                        |            |            |                                        |            |            |                                        |            |  |
| Software                                | CryoSparc v3.0.1                       |            |            | CryoSparc v3.0.1                       |            |            | CryoSparc v3.0.1                       |            |  |
| # of Micrographs                        | 5,075                                  |            |            | 2,135                                  |            |            | 5,177                                  |            |  |
| # of particles                          | 74,756                                 | 161,974    | 161,524    | 99,745                                 | 743,99     | 137,974    | 104,069                                | 33,092     |  |
| Symmetry                                |                                        |            |            | C1                                     |            |            |                                        |            |  |
| # of antibody                           | -                                      | 1          | 1          | 1                                      | 1          | 1          | 3                                      | 2          |  |
| Resolution (Å, GS-FSC=0.143)            | 3.36                                   | 3.46       | 3.53       | 3.82                                   | 4.16       | 3.74       | 3.15                                   | 4.06       |  |
| EMDB ID                                 | 30915                                  | 30916      | 30117      | 30918                                  | 30919      | 30920      | 30921                                  | 30922      |  |
| <b>Model building</b>                   |                                        |            |            |                                        |            |            |                                        |            |  |
| Method                                  | Homology modeling & Rigid body fitting |            |            | Homology modeling & Rigid body fitting |            |            | Homology modeling & Rigid body fitting |            |  |
| Template model (spike)                  | 7KEB                                   |            |            | 7K8W                                   |            |            | 7K8W                                   |            |  |
| Template model (Fab)                    |                                        |            |            | 5K8M*1                                 |            |            | 5K8M*1                                 |            |  |
| Fitting software                        |                                        |            |            | MODELL ER v9.23                        |            |            | MODELL ER v9.23                        |            |  |
| Fitting Criteria                        |                                        |            |            | UCSF Chimera v1.14                     |            |            | UCSF Chimera v1.14                     |            |  |
| Correlation after fitting               |                                        |            |            | 0.829                                  |            |            | 0.780                                  |            |  |
| Modeling software (Fab)                 |                                        |            |            | Repertoire Builder                     |            |            | Repertoire Builder                     |            |  |
| # of Atoms                              | 13,452                                 |            |            | 15,212                                 |            |            | 18,708                                 |            |  |
| Ramachandran Favored (%)                | 93                                     |            |            | 95                                     |            |            | 95                                     |            |  |
| Allowed (%)                             | 5                                      |            |            | 4                                      |            |            | 4                                      |            |  |
| Outlier (%)                             | 2                                      |            |            | 1                                      |            |            | 1                                      |            |  |
| Clash score                             | 2                                      |            |            | 3                                      |            |            | 1                                      |            |  |
| RMSZ bound length (Å)                   | 0.87                                   |            |            | 0.93                                   |            |            | 0.94                                   |            |  |
| RMSZ bound angle (°)                    | 0.95                                   |            |            | 0.91                                   |            |            | 0.91                                   |            |  |
| PDBID                                   | 7DZW                                   |            |            | 7DZX                                   |            |            | 7DZY                                   |            |  |
| <b>Related figure</b>                   | Figure 5D<br>Figure S4D                | Figure S4E | Figure S4F | Figure 5D<br>Figure S4G                | Figure S4H | Figure S4I | Figure 5D<br>Figure S4J                | Figure S4K |  |

\*1 The variable region of Fab was modelled by Repertoire Builder. See details in Methods.
